# Supplementary material for: An Er-doped TiO2 phase junction as an electron transport layer for efficient perovskite solar cells fabricated in air
Source: Royal Society of Chemistry journal article supplement (doi:10.1039/c8ta04444a), 2018-01-01
Supplement: c8ta04444a1.pdf [file c8ta04444a1.pdf]

# **Er-doped TiO<sub>2</sub> phase junction as electron transport layer for efficient perovskite solar cells fabricated in air**

Ziqiu Ren,<sup>a</sup> Jinde Wu,<sup>a</sup> Na Wang,<sup>a</sup> Xin Li<sup>\*ab</sup>

<sup>a</sup>*School of Chemistry and Chemical Engineering, Harbin Institute of Technology, 150001, China.*

<sup>b</sup>*State Key Lab of Urban Water Resource and Environment, Harbin Institute of Technology, 150001, China.*

*\*Corresponding author: Xin Li*

*E-mail address: [lixin@hit.edu.cn](mailto:lixin@hit.edu.cn) (X. Li)*

**Table S1** The calculated mass ratio of rutile ( $X_R$ ) and anatase ( $X_A$ ) according to XRD spectra and the recombination resistance ( $R_{rec}$ ) of TiO<sub>2</sub>-based PSCs with different Er doping ratio.

| Er Doping Ratio          | $X_A$ (%) | $X_R$ (%) | $R_{rec}$ ( $\Omega$ ) |
|--------------------------|-----------|-----------|------------------------|
| undoped TiO <sub>2</sub> | 7.93      | 92.07     | 349                    |
| 0.25%                    | 20.37     | 79.63     | 395                    |
| 0.50%                    | 49.18     | 50.82     | 771                    |
| 0.75%                    | 63.73     | 36.20     | 982                    |
| 1.00%                    | 100       | 0         | 234                    |

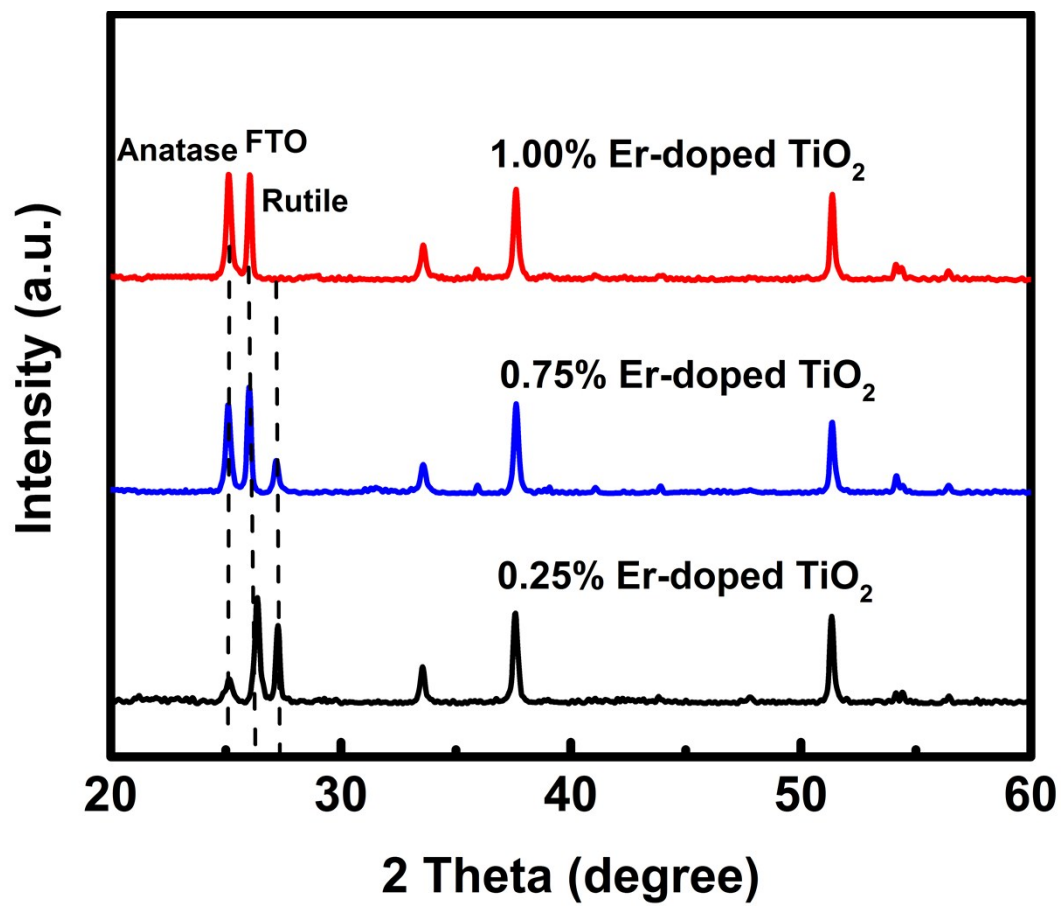

Fig. S1 XRD patterns of TiO<sub>2</sub> films with 0.25%, 0.75%, and 1.00% Er doping ratio on FTO.

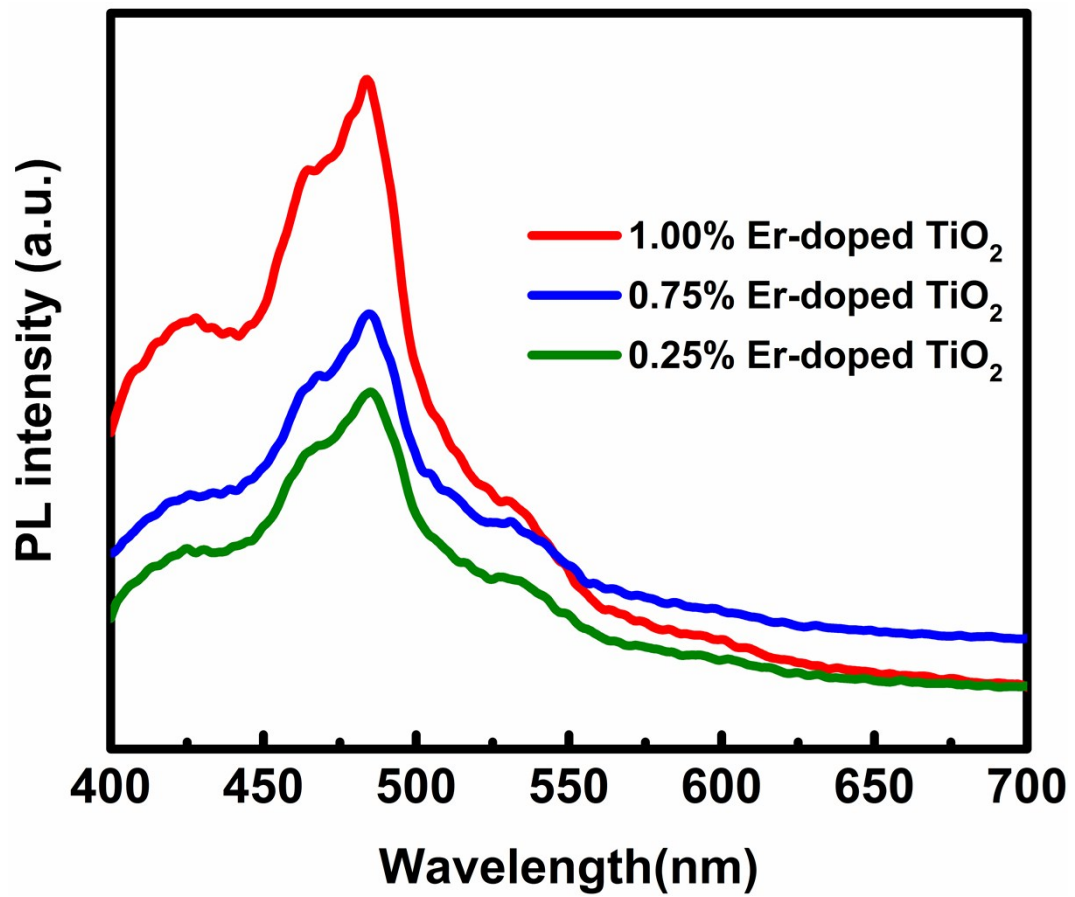

Fig. S2 PL spectra of TiO<sub>2</sub> films with 0.25%, 0.75% and 1.00% Er doping ratio on FTO

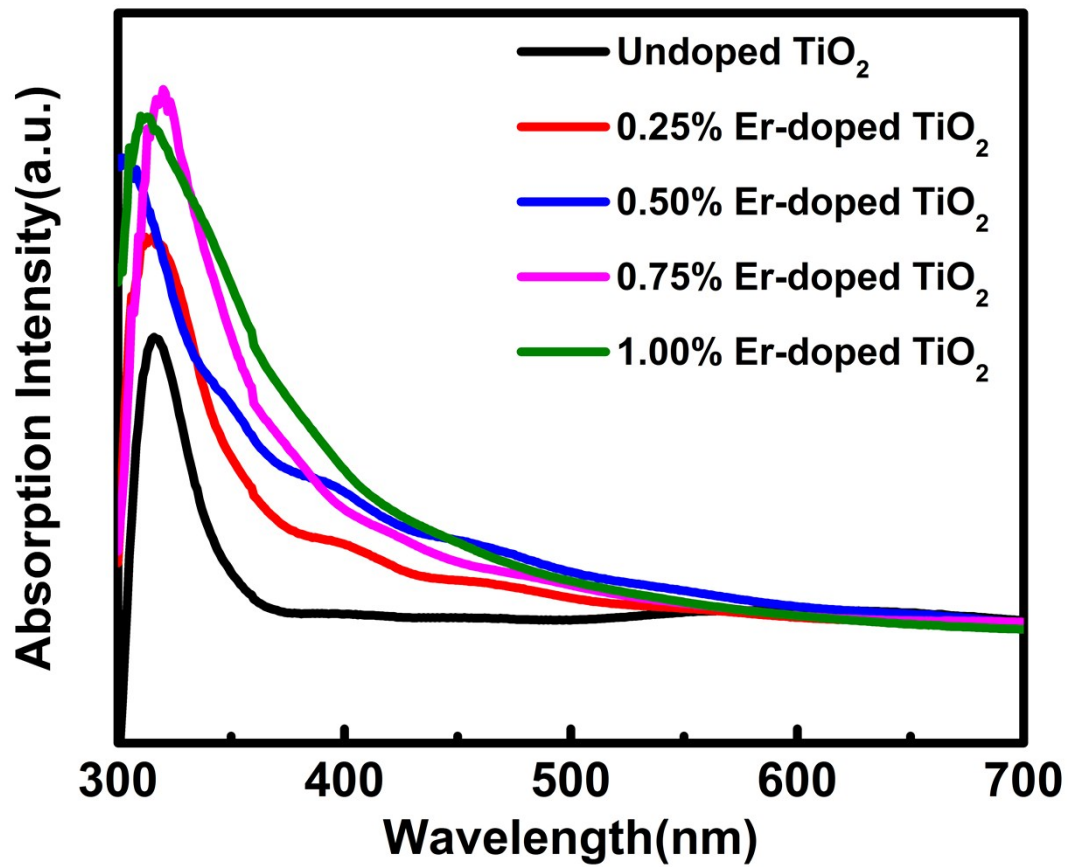

**Fig. S3** UV-vis spectra of TiO<sub>2</sub> films without and with 0.25%, 0.50%, 0.75% and 1.00% Er doping ratio on FTO.

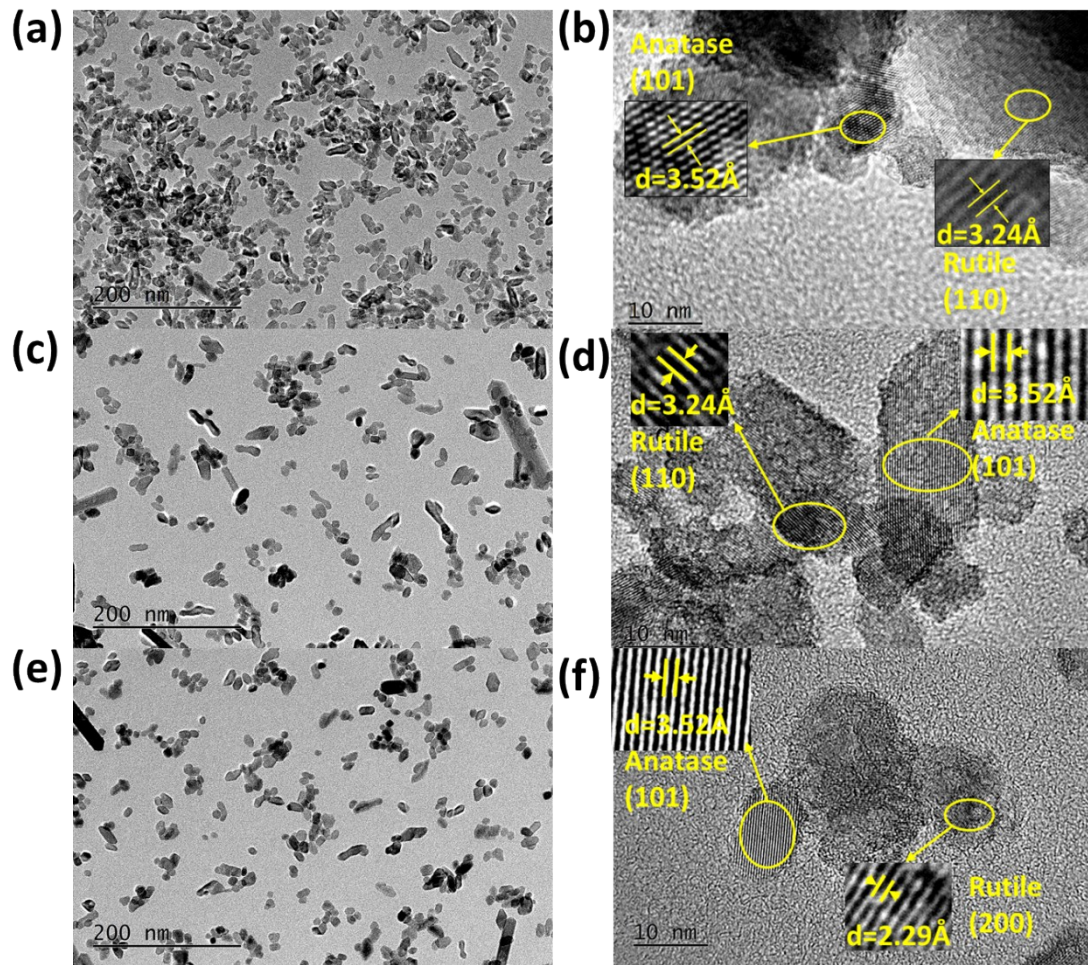

**Fig. S4** TEM images (a), (c), (e) and high-resolution TEM images (b), (d), (f) of 0.25%, 0.75% and 1.00% Er-doped TiO<sub>2</sub> respectively.

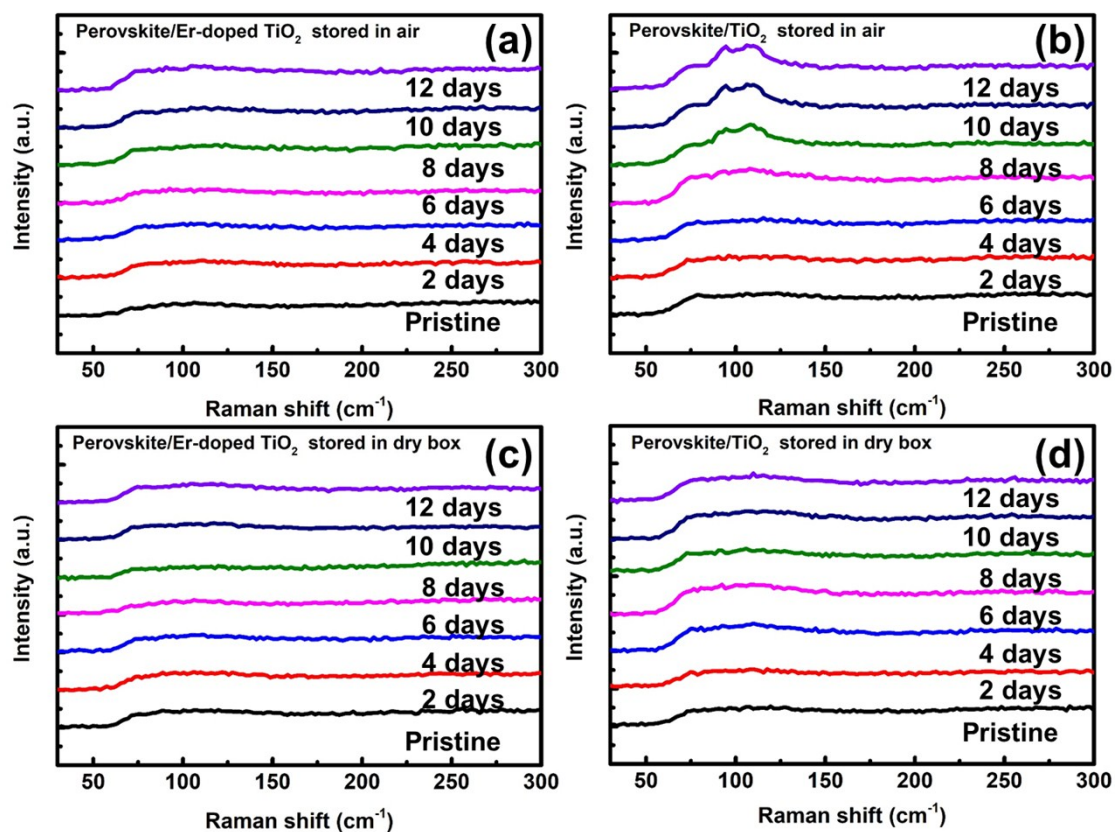

**Fig. S5.** Raman spectra of perovskite films on Er-doped TiO<sub>2</sub> (a) in air (RH > 50%) and (c) in dry box (RH < 20%), and Raman spectra of perovskite films on undoped TiO<sub>2</sub> (b) in air (RH > 50%) and (d) in dry box (RH < 20%) as a function of stored time (days).

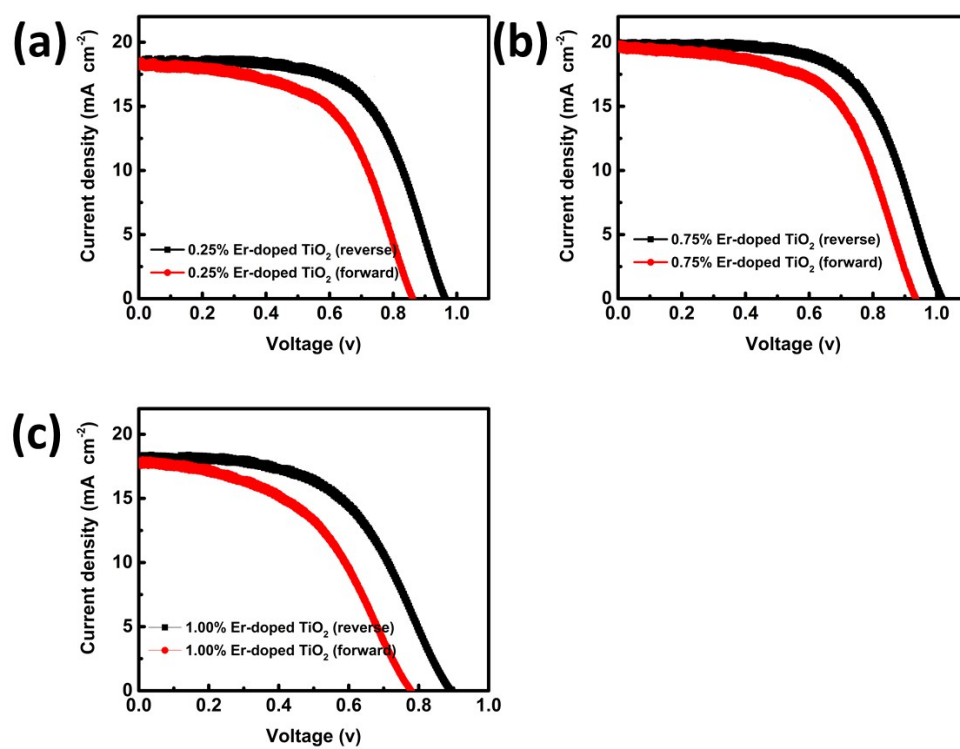

**Fig. S6** *J-V* curves of the devices (a), (b), (c) with 0.25%, 0.75% and 1.00% Er-doped TiO<sub>2</sub> respectively.
